# Supplementary material for: Epigenetic toxicity of trichloroethylene: a single-molecule perspective
Source: Royal Society of Chemistry journal article supplement (doi:10.1039/c5tx00454c), 2016-01-01
Supplement: c5tx00454c1.pdf [file c5tx00454c1.pdf]

## Supplementary Information

### Epigenetic Toxicity of Trichloroethylene: A Single-Molecule Perspective

*Yi Cui, Samrat Roy Choudhury, and Joseph Irudayaraj\**

Department of Agricultural and Biological Engineering, Bindley Bioscience Center, Purdue  
Center for Cancer Research, Purdue University, West Lafayette, IN 47907, USA

**\*Corresponding Author**, E-mail: [josephi@purdue.edu](mailto:josephi@purdue.edu); Tel: +1 (765)494-0388; Address: 225  
S. University Street, Purdue University, West Lafayette, IN 47907, USA

Supplementary Figures and Tables

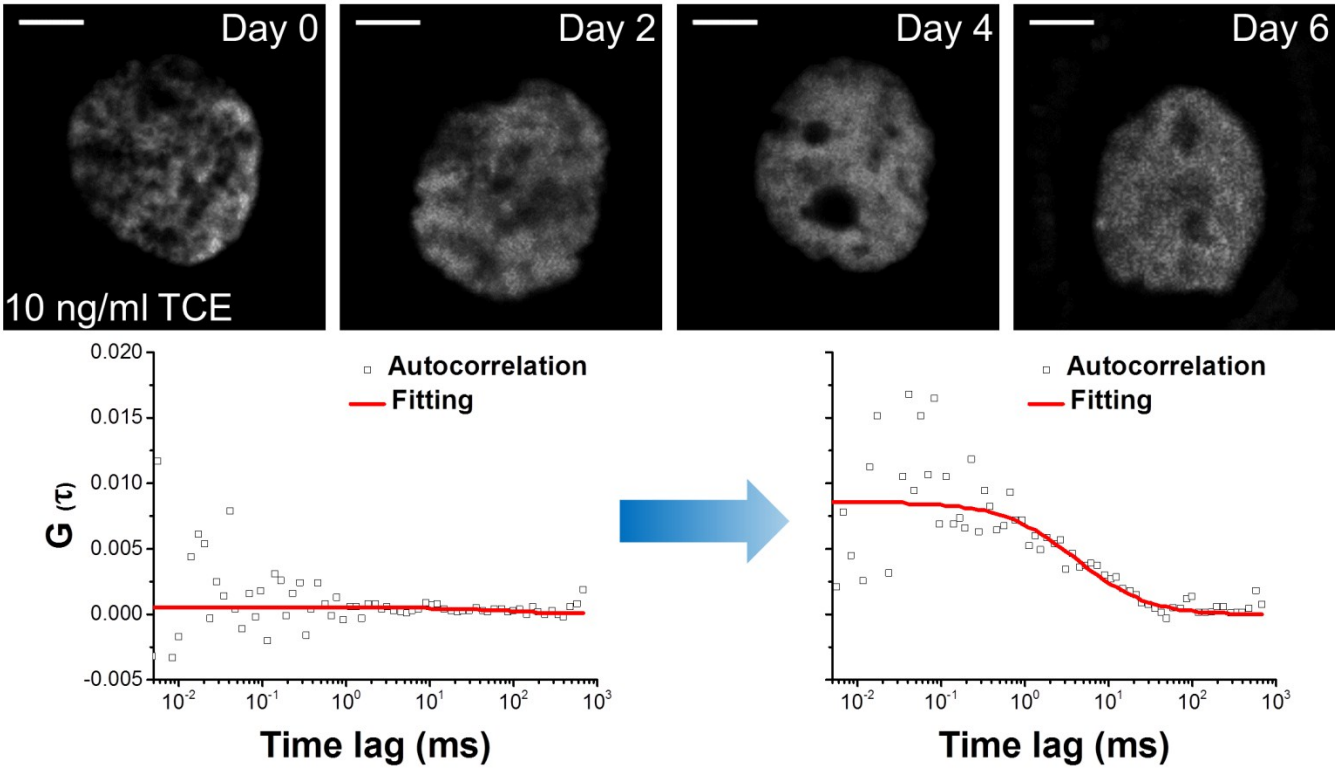

Figure S1 Redistribution and detachment of Dnmt3a-EGFP under a low-dosage, chronic TCE exposure.

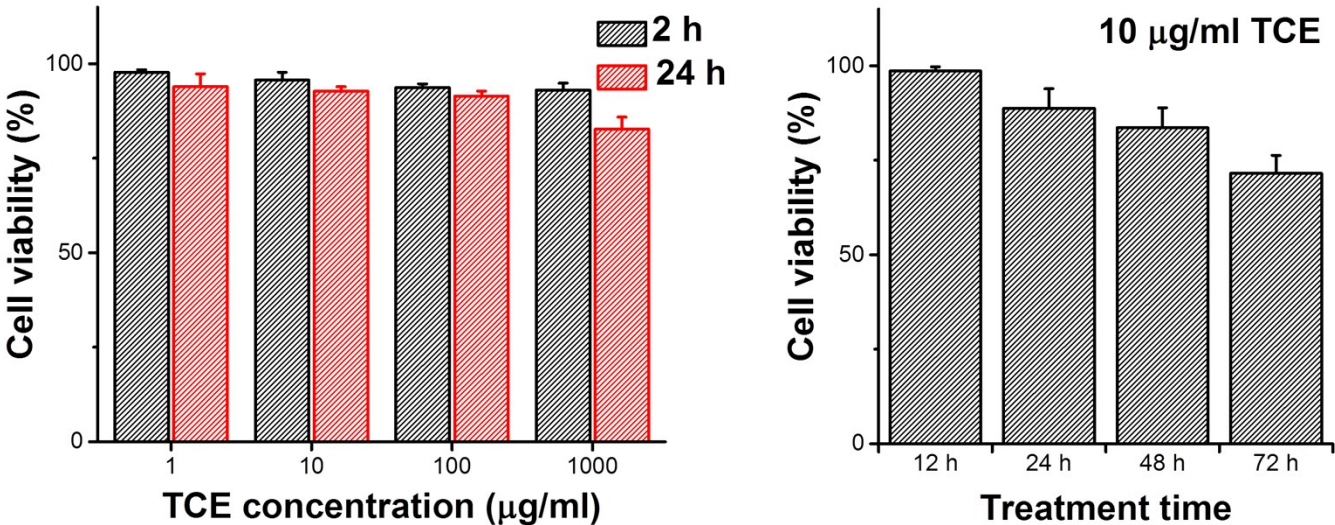

Figure S2 HeLa cell viability upon exposure to TCE (results from MTT assay, n = 8).

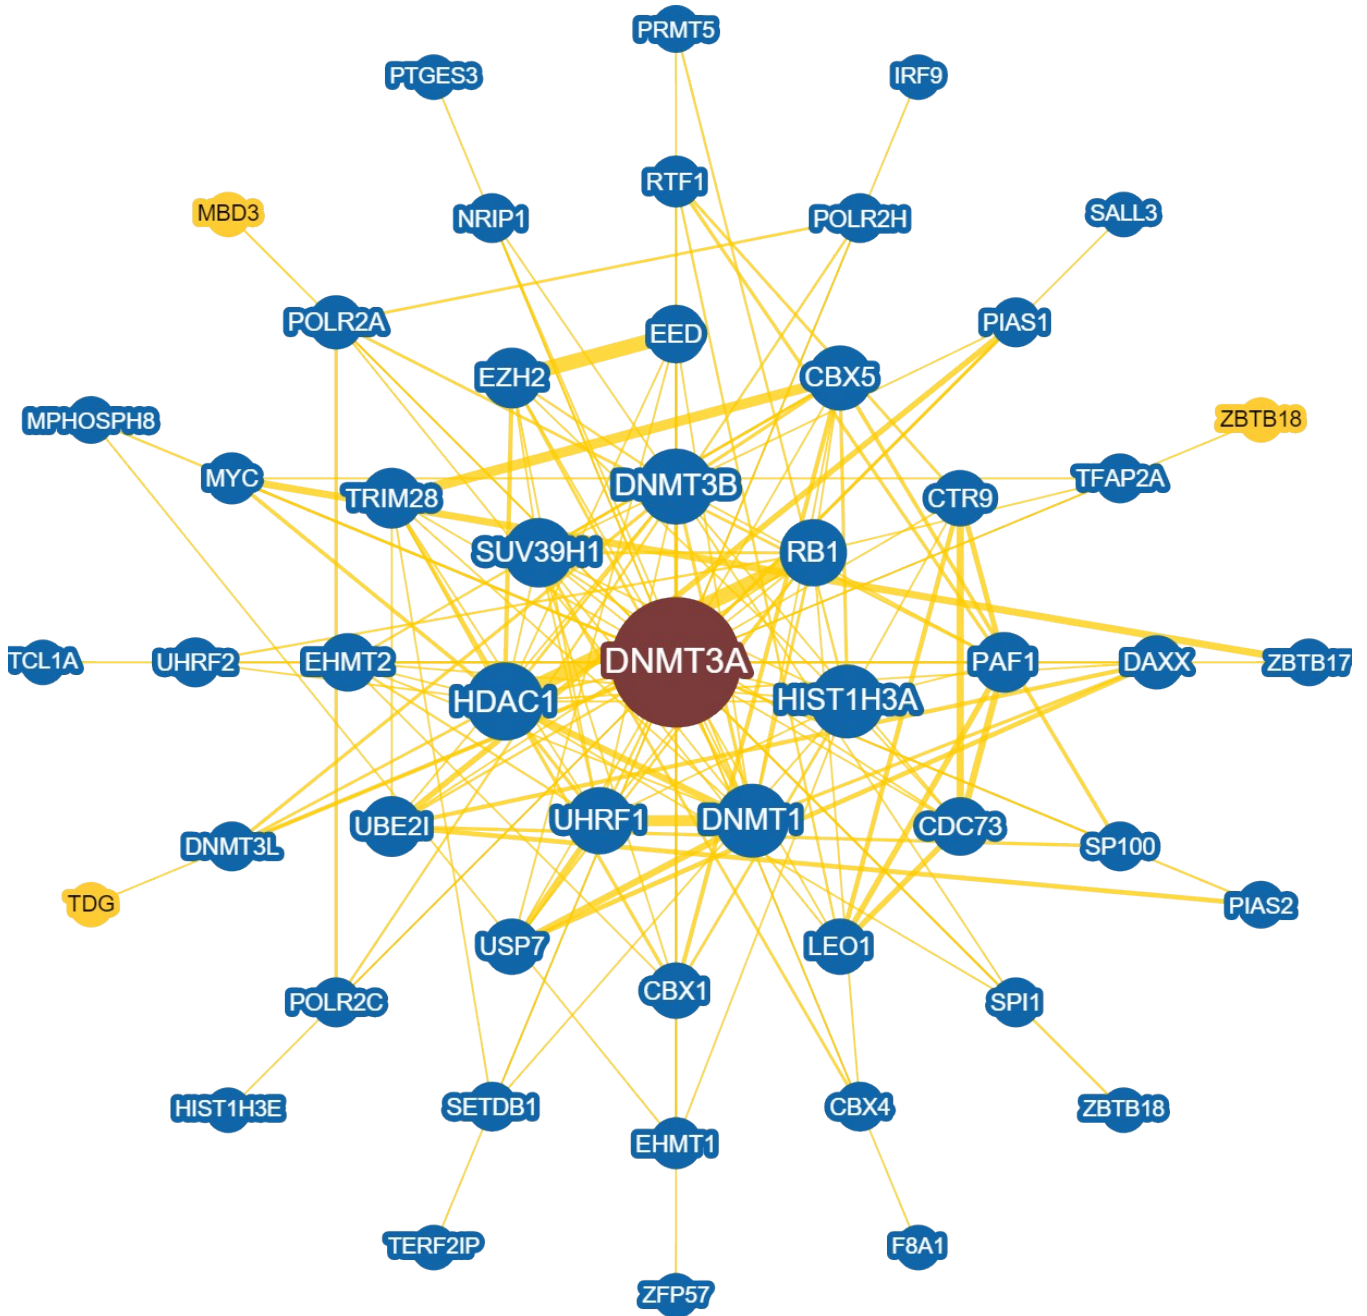

Figure S3 Proteins associated with Dnmt3a (data retrieved from <http://thebiogrid.org/>).

|                                                 | Concentration        | Exp. Time  | Assay Performed                          | Results Info.     |
|-------------------------------------------------|----------------------|------------|------------------------------------------|-------------------|
| HEK293 cells:<br>chronic, low-<br>concentration | 10 ng/ml             | 0-5 weeks  | global methylation                       | Figure 1          |
|                                                 | 10 ng/ml             | 5 weeks    | promoter methylation of<br>cancer miRNAs | Figure 7          |
| HeLa cells:<br>acute, high-<br>concentration    | 1 µg/ml – 1000 µg/ml | 24 hours   | global methylation                       | Figure 2c         |
|                                                 | 10 µg/ml             | 0-72 hours | global methylation                       | Figure 2d         |
|                                                 | 10 µg/ml             | 72 hours   | qRT-PCR for Dnmt and<br>Tet transcripts  | Figure 6          |
|                                                 | 1 µg/ml – 1000 µg/ml | 2 hours    | confocal imaging for<br>Dnmt3a-EGFP      | Figure 3          |
|                                                 | 1 µg/ml – 1000 µg/ml | 2 hours    | FCS for Dnmt3a-EGFP                      | Figure 5, Table 3 |

Table S1 Design of this study.
